# Supplementary material
Source: publisher figshare collection journal article supplement (https://acs.figshare.com/ndownloader/files/5116948)
Supplement: Supplementary file 1 [file 5116948]

## SUPPORTING INFORMATION

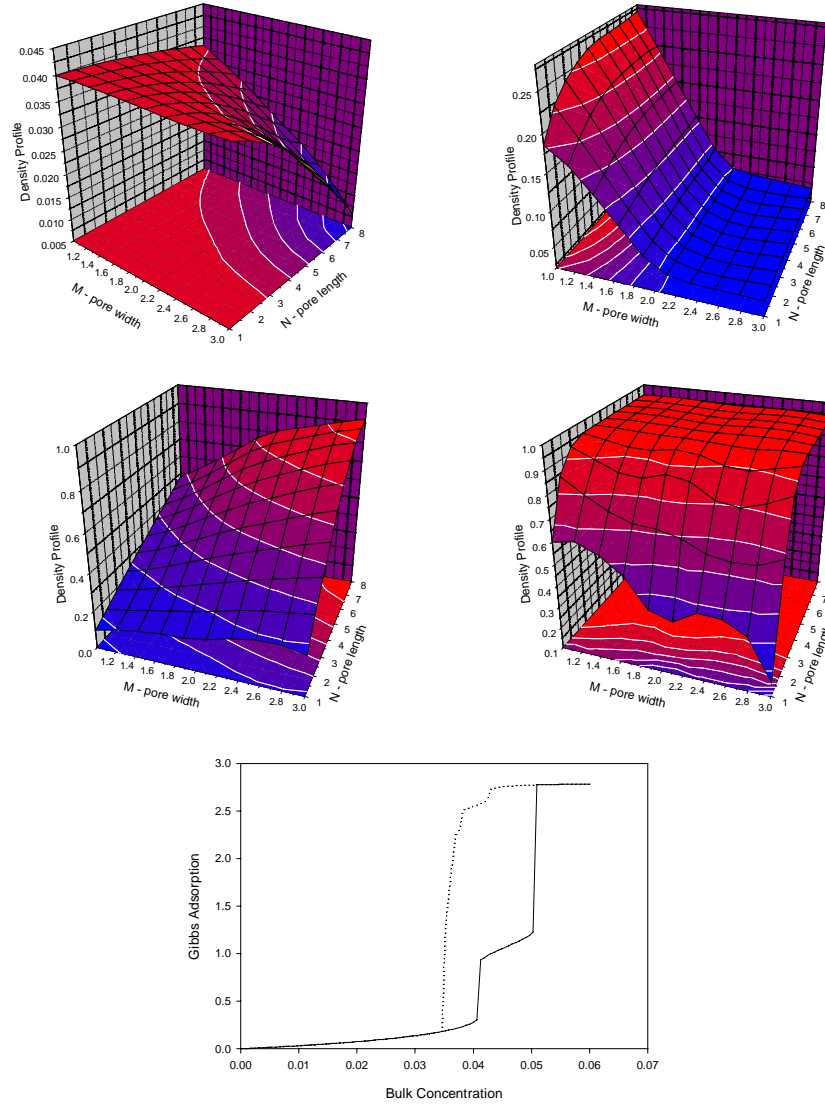

**Figure 1S.** Left panel presents initial two-dimensional density profile generated from eqs 4 and 5. Right panel shows the final density profile. The Gibbs excess adsorption/desorption isotherm is also presented below. The computations were performed for the following parameters:  $N = 15$ ,  $M = 5$ ,  $\alpha = -1.1$ ,  $\varepsilon_s / k_b T = -1.2$ , and bulk density  $\rho_\infty = 0.04$ .

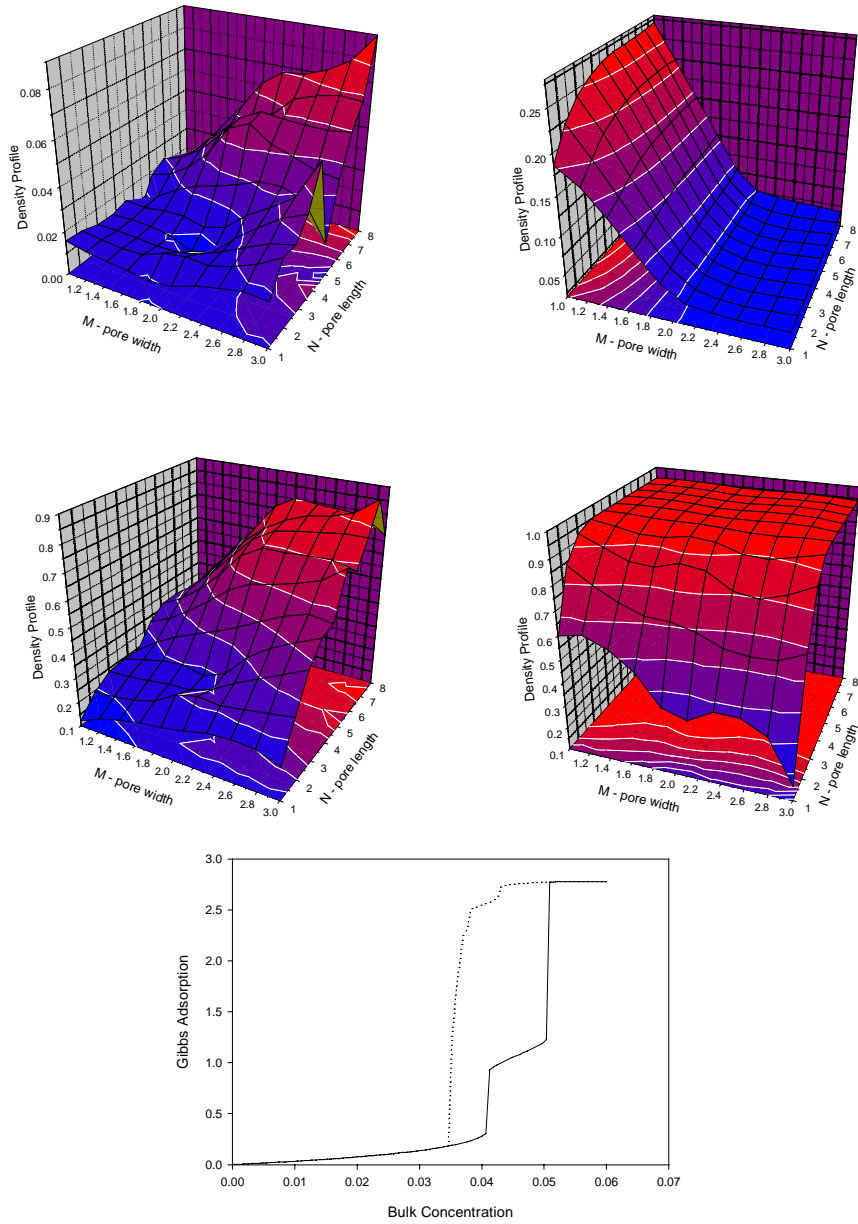

**Figure 2S.** Left panel presents initial two-dimensional density profile generated from eqs 9 and 11. Right panel shows the final density profile. The Gibbs excess adsorption/desorption isotherm is also presented below. The computations were performed for the following parameters:  $N = 15$ ,  $M = 5$ ,  $\alpha = -1.1$ ,  $\varepsilon_s / k_b T = -1.2$ , and bulk density  $\rho_\infty = 0.04$ .

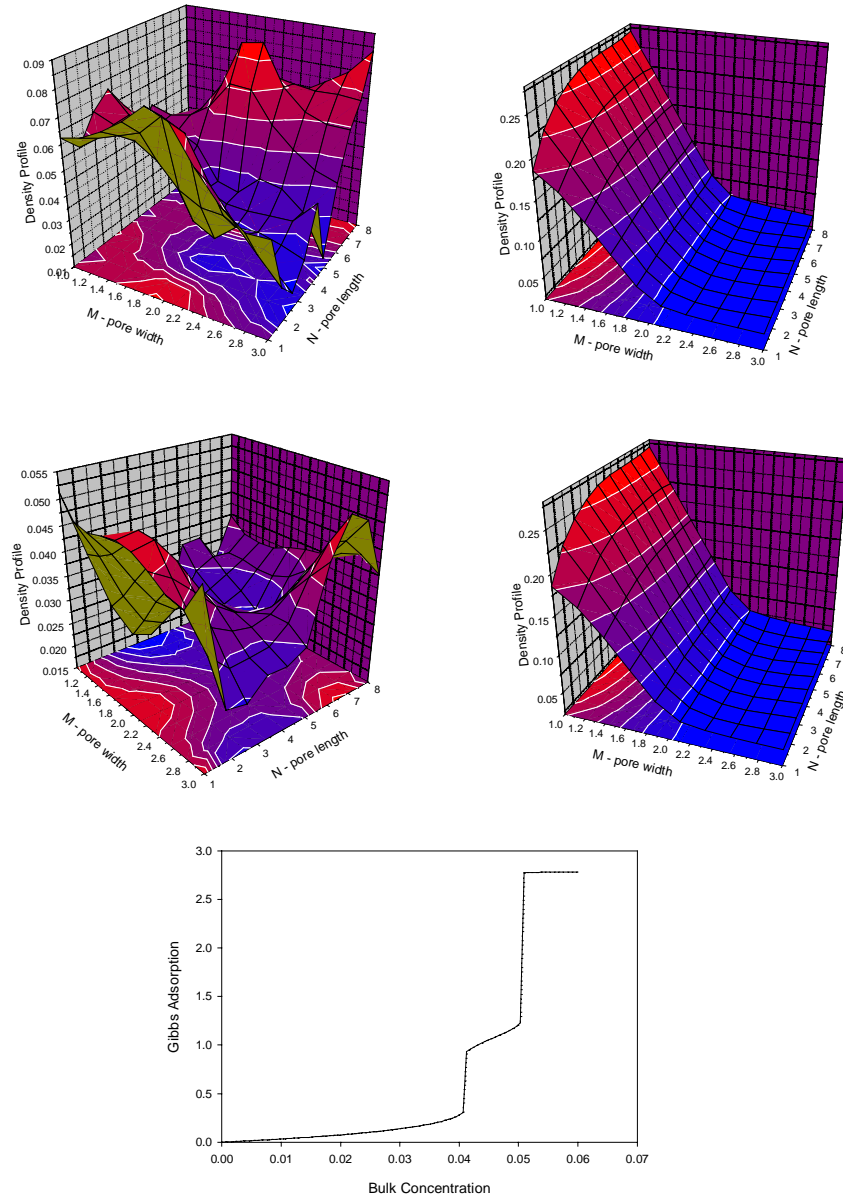

**Figure 3S.** Left panel presents initial two-dimensional density profile generated from eqs 9 and 10. Right panel shows the final density profile. The Gibbs excess adsorption/desorption isotherm is also presented below. The computations were performed for the following parameters:  $N = 15$ ,  $M = 5$ ,  $\alpha = -1.1$ ,  $\varepsilon_s/k_bT = -1.2$ , and bulk density  $\rho_\infty = 0.04$ .
